# Supplementary material for: Exceptional ultrafast nonlinear optical response of functionalized silicon nanosheets
Source: Royal Society of Chemistry journal article supplement (doi:10.1039/d3nr03497f), 2023-01-01
Supplement: d3nr03497f1.pdf [file d3nr03497f1.pdf]

## Supporting Information

# Exceptional Ultrafast Nonlinear Optical Response of Functionalized Silicon Nanosheets

Michalis Stavrou,<sup>‡a,b</sup> Amelie M. Mühlbach,<sup>‡c</sup> Vasilios Arapakis,<sup>a,b</sup> Elisabeth Groß,<sup>c</sup> Tim Kratky,<sup>d</sup> Sebastian Günther,<sup>d</sup> Bernhard Rieger,<sup>\*c</sup> and Stelios Couris<sup>\*a,b</sup>

<sup>a</sup>*Department of Physics, University of Patras, 265 04 Patras, Greece.*

*E-mail: [couris@upatras.gr](mailto:couris@upatras.gr)*

<sup>b</sup>*Foundation for Research and Technology Hellas-Institute of Chemical Engineering Sciences (FORTH/ICE-HT), 26504 Rio-Patras, Greece.*

*E-mail: [couris@iceht.forth.gr](mailto:couris@iceht.forth.gr)*

<sup>c</sup>*Wacker-Chair of Macromolecular Chemistry, Department of Chemistry, TUM School of Natural Sciences, Technical University of Munich, Lichtenbergstraße 4, 85748 Garching, Germany.*

*E-mail: [rieger@tum.de](mailto:rieger@tum.de)*

<sup>d</sup>*Physical Chemistry with Focus on Catalysis, Department of Chemistry, TUM School of Natural Sciences, Technical University of Munich, Lichtenbergstraße 4, 85748 Garching, Germany.*

<sup>‡</sup> These authors contributed equally

## FT-IR and Raman spectra

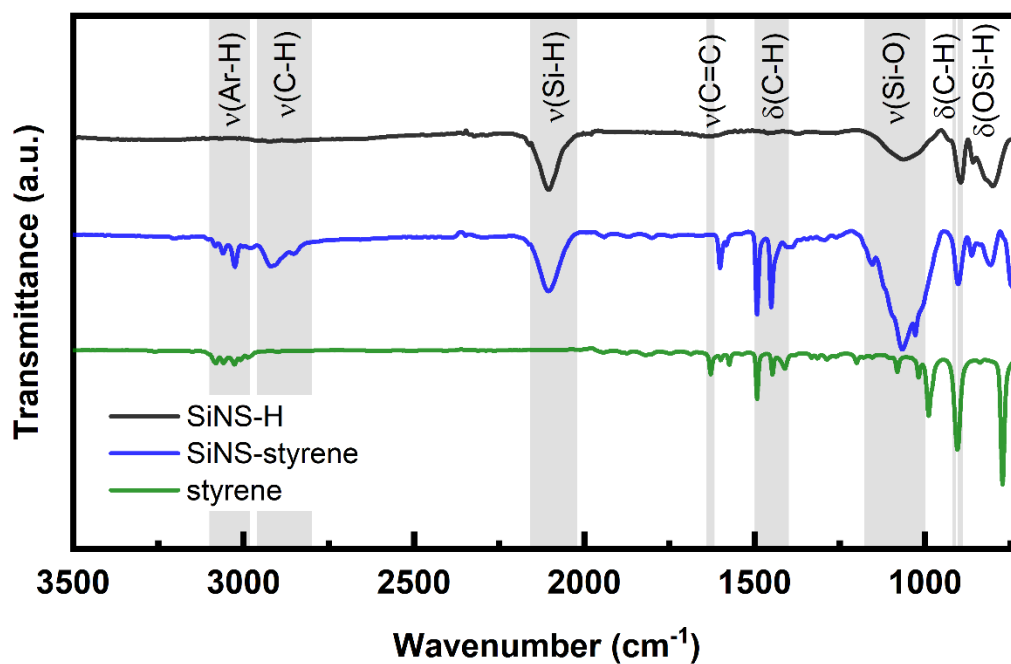

**Figure S1.** FT-IR spectra of SiNS-H, SiNS-styrene, and styrene ( $\nu$ : stretching,  $\delta$ : deformation vibrations).

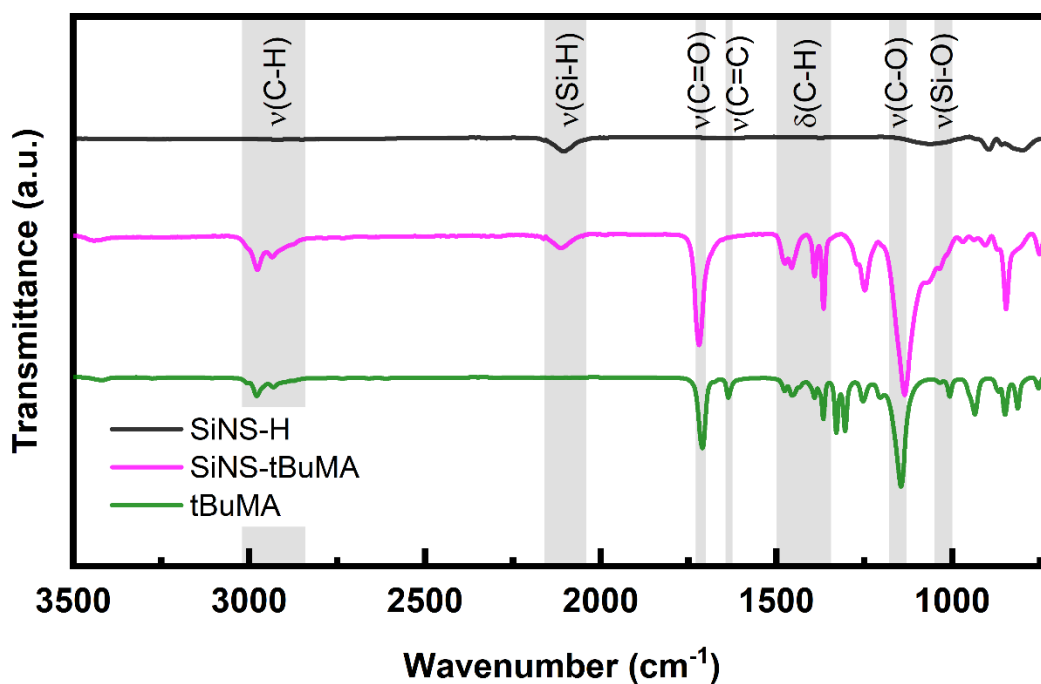

**Figure S2.** FT-IR spectra of SiNS-H, SiNS-tBuMA, and tBuMA ( $\nu$ : stretching,  $\delta$ : deformation vibrations).

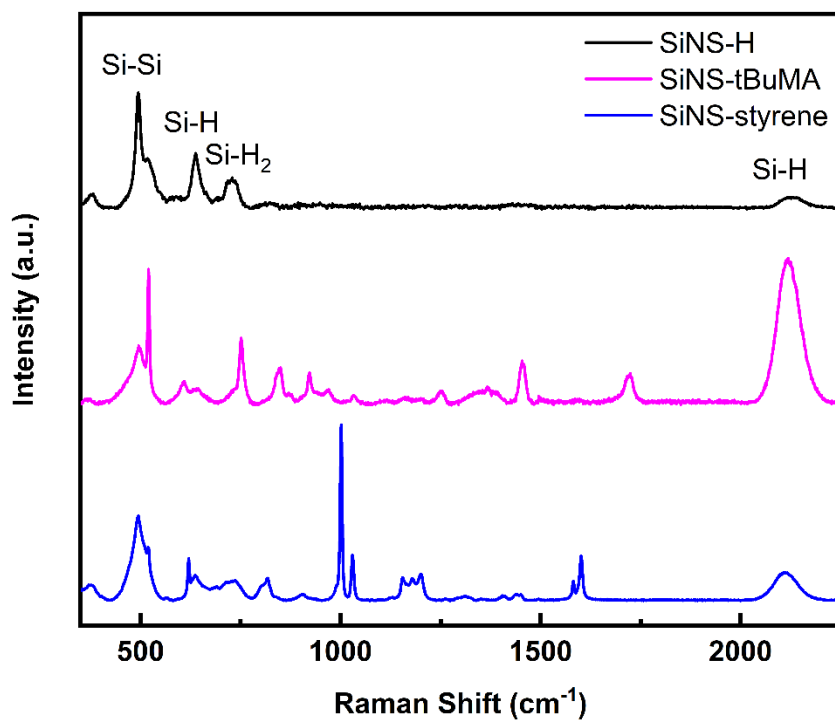

**Figure S3.** Raman spectra of SiNS-H, SiNS-styrene, and SiNS-tBuMA.

#### TGA measurements

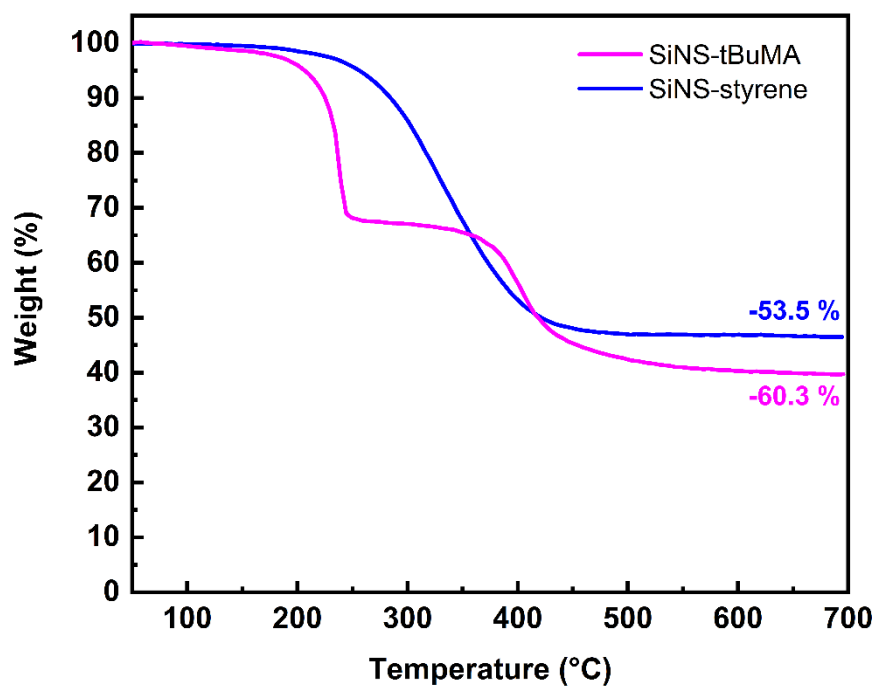

**Figure S4.** TGA data of SiNS-styrene and SiNS-tBuMA.

## Surface coverage

Assuming that the mass loss obtained from TGA is only due to the cleavage of styrene or tBuMA, respectively, and the remaining mass is silicon, the surface coverages of functionalized SiNSs were calculated by the ratio of the amount of organic groups to the amount of silicon (equation (S1)):

$$\frac{n_R}{n_{Si}} = \frac{M_{Si}}{M_R} \cdot \frac{ML}{1-ML} \quad (S1)$$

where  $n_R$  is the amount of either styrene or tBuMA,  $n_{Si}$  is the amount of silicon,  $ML$  is the mass loss,  $M_R$  is the molar mass of styrene (104.2 g/mol) or tBuMA (142.2 g/mol), and  $M_{Si}$  is the molar mass of silicon (28.09 g/mol). Protons attached to silicon are neglected in this calculation. Table S1 shows the TGA mass losses and corresponding surface coverages of the functionalized SiNSs calculated with equation (S1).

**Table S1.** TGA mass loss and calculated surface coverages of functionalized SiNSs.

|              | TGA mass loss | surface coverage |
|--------------|---------------|------------------|
| SiNS-styrene | 54%           | 31%              |
| SiNS-tBuMA   | 60%           | 30%              |

## AFM images

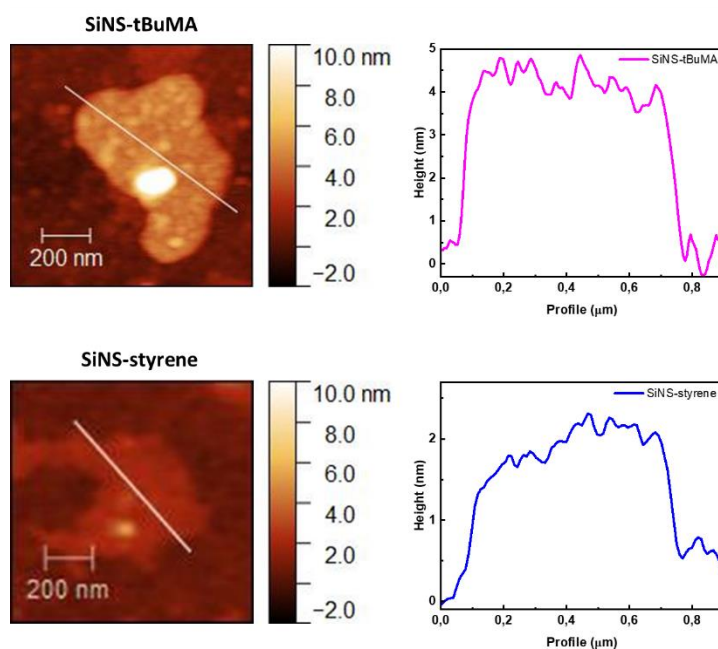

**Figure S5.** AFM images of SiNS-tBuMA and SiNS-styrene.

## Electron microscopy images

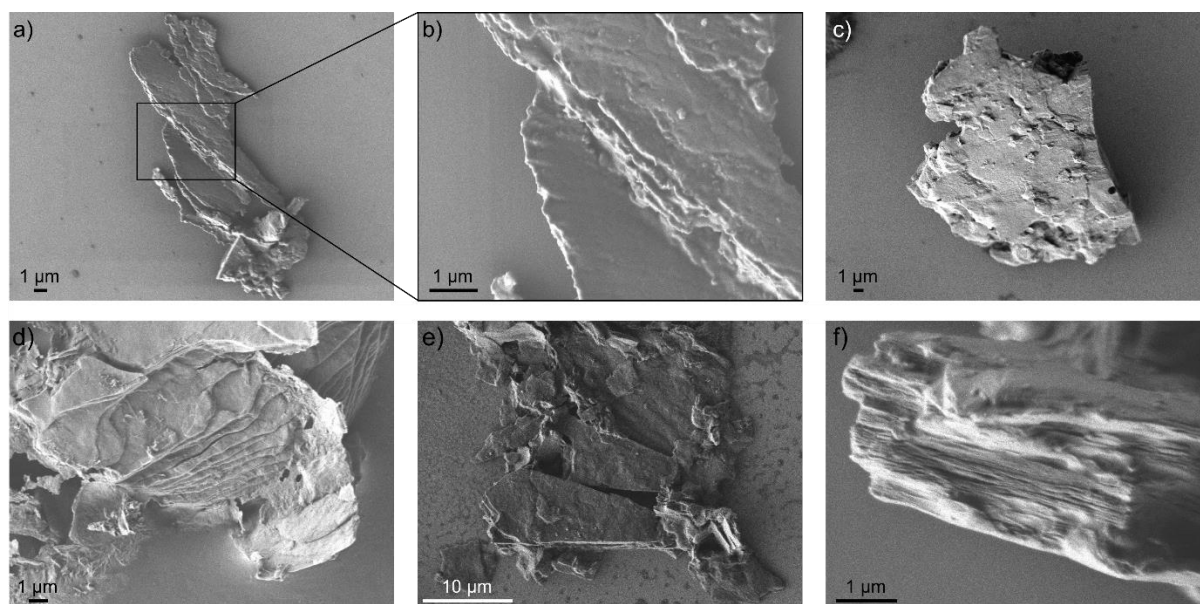

**Figure S6.** SEM images of SiNS-styrene (a-c) and SiNS-tBuMA (d-f). a), c), and e) show some dark spots beside the nanosheets, indicating residual polymer.

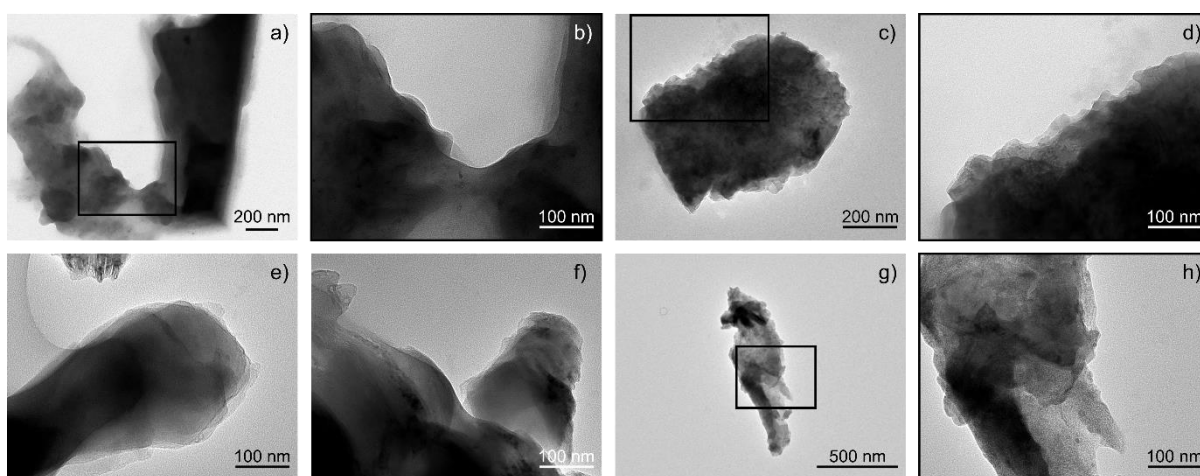

**Figure S7.** TEM images of SiNS-styrene (a-d) and SiNS-tBuMA (e-h). b), c), and h) show higher magnifications of a), c), and g), respectively.

## PL spectra

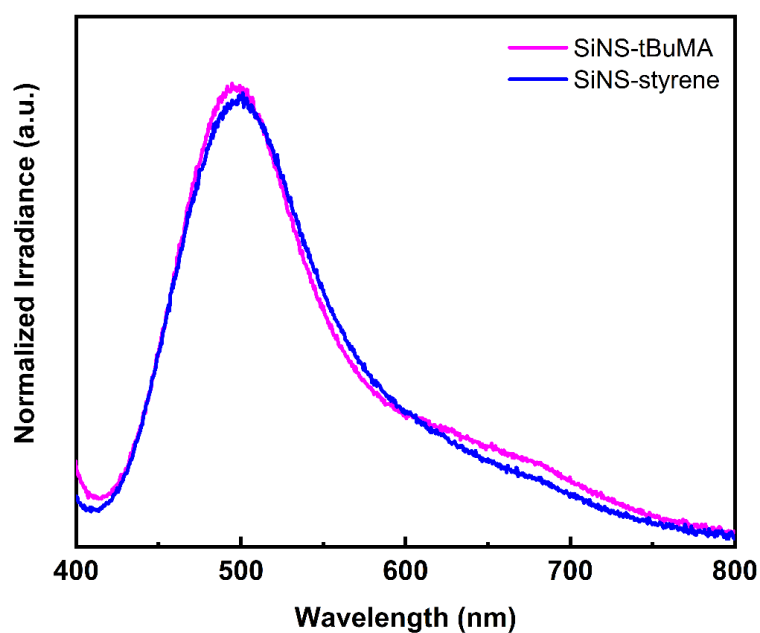

**Figure S8.** PL spectra of SiNSs functionalized with styrene and tBuMA, excited at 365 nm.

Both PL spectra exhibit an emission maximum at 500 nm, independent of their surface group. This is a typical value for SiNS capped with organic groups.[S1]

## Intensity-dependent nonlinear absorption coefficient

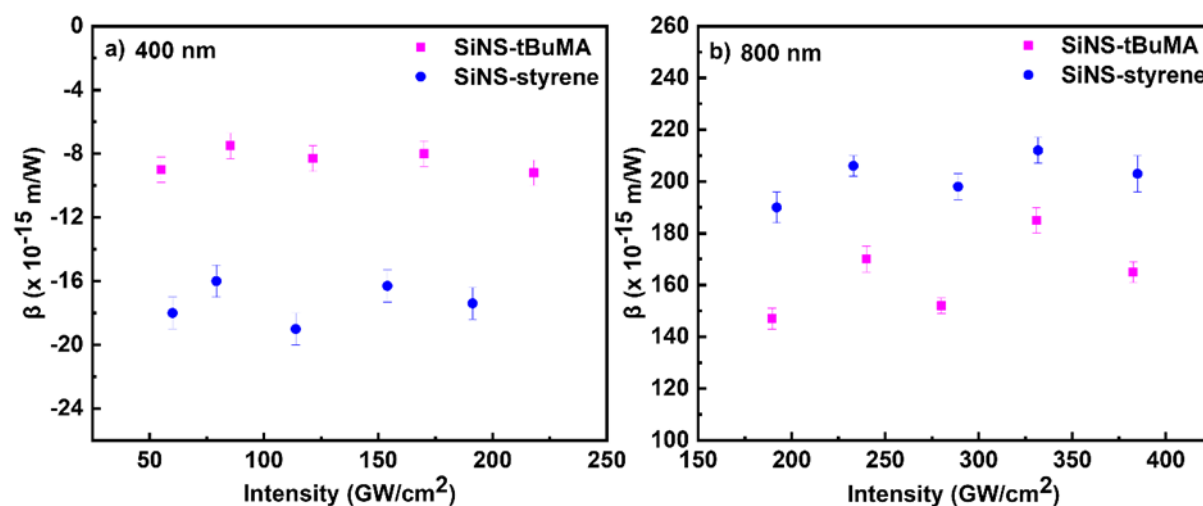

**Figure S9.** Intensity-independent nonlinear absorption coefficient  $\beta$  of SiNS-tBuMA and SiNS-styrene under (a) 400 and (b) 800 nm laser excitation. All the values refer to a concentration of 0.1 mg/mL.

## Z-scan recordings of SiNS-H

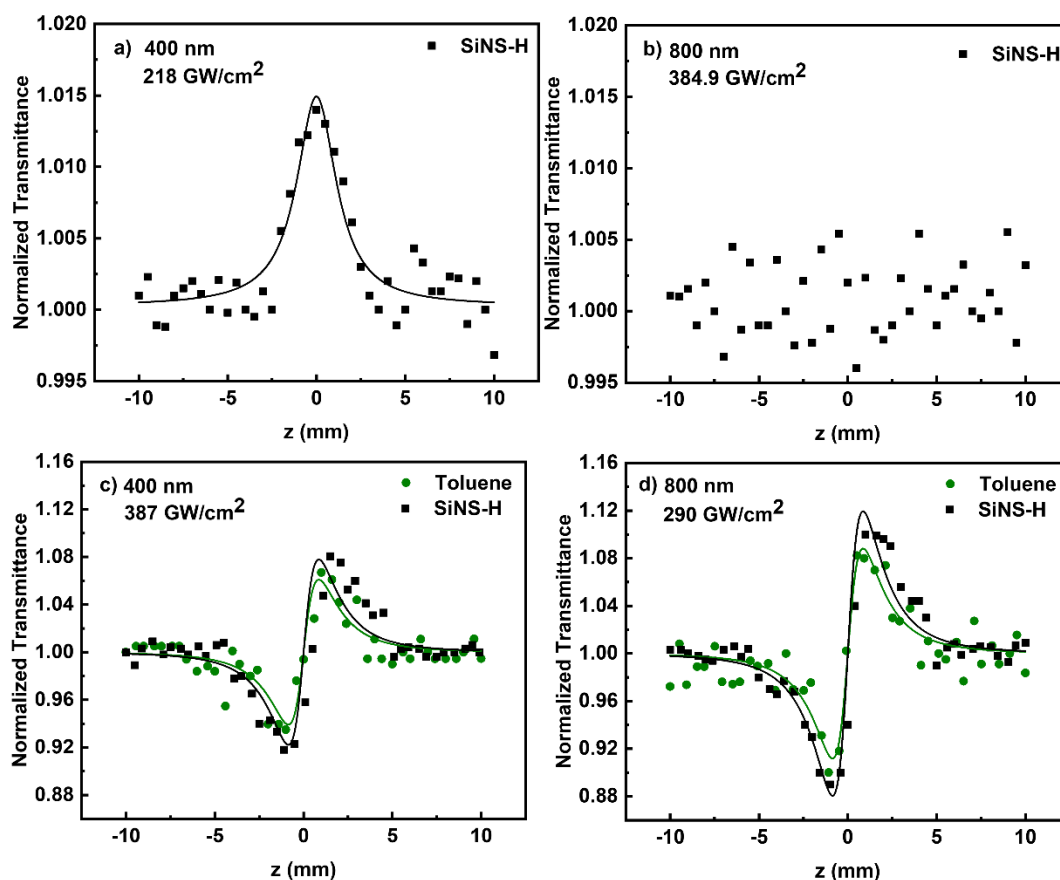

**Figure S10.** OA (a, b) and “divided” Z-scans (c, d) of SiNS-H under fs, 400 and 800 nm laser excitation. All the Z-scans refer to a concentration of 1 mg/mL.

## Purity of SiNS-styrene and SiNS-tBuMA

To determine whether the samples of functionalized SiNSs only consist of SiNSs covalently bonded to styrene or tBuMA moieties or a composite material of surface functionalized SiNSs embedded in a polymer matrix, two experiments were performed: In the first experiment, SiNS-styrene and SiNS-tBuMA dispersions in THF (6.7 mg/mL) were sonicated for 9 hours. The supernatant was filtered through a 0.45  $\mu$ m syringe filter and analyzed *via* GPC with a refractive index detector. The chromatograms showed no signals to be assigned to polymeric or oligomeric structures. This result was further confirmed by thin layer chromatography (TLC). Therefore, dispersions of SiNS-styrene and SiNS-tBuMA in DCM (5.0 mg/mL) were sonicated for 7 hours. After sedimentation of the SiNSs, small spots of the supernatants were applied to a silica plate. The TLC plate was developed in THF, dried, and visualized under UV light. As no spots appeared for the SiNS samples, it was concluded that the functionalized SiNSs are

pure samples without any impurities (remaining initiating iodonium salt or monomers) or polymer matrix. Minor traces of polymeric structures were observed in SEM images (Figure S6a), c), and e)), but as GPC experiments did not detect polymer in the samples, the low concentration of residual polymer is probably negligible.

### NLO properties of SiNS-tBuMA, SiNS-styrene, and other 2D nanomaterials

**Table S2.** NLO absorption-related parameters ( $\beta$ : nonlinear absorption coefficient;  $\text{Im}\chi^{(3)}$ : imaginary part of the third-order susceptibility; FOM: figure of merit (i.e.,  $\text{Im}\chi^{(3)}/\alpha_0$ ) of SiNS-tBuMA, SiNS-styrene, and other 2D nanostructures, all measured under similar laser excitation conditions at 800 nm.

| Excitation conditions   | Sample                                                 | T (%) | $\alpha_0$ ( $\text{cm}^{-1}$ ) | $\beta$ ( $\times 10^{-15}$ m/W) | $\text{Im}\chi^{(3)}$ ( $\times 10^{-16}$ esu) | FOM ( $\times 10^{-16}$ esu cm) | Ref.      |
|-------------------------|--------------------------------------------------------|-------|---------------------------------|----------------------------------|------------------------------------------------|---------------------------------|-----------|
| 130 fs, 800 nm, 10 Hz   | GO/water                                               | ~90   | 0.52                            | 30                               | 13.5                                           | 26                              | S1        |
| 100 fs, 800 nm, 1 KHz   | Reduced-GO/glass                                       | ~78   | $6.7 \times 10^4$               | $336 \times 10^4$                | $1.94 \times 10^{-8}$                          | 2895                            | S2        |
| 100 fs, 800 nm, 100 kHz | $\text{Ti}_3\text{C}_2\text{T}_x$ (large flakes)/water | -     | 9.6                             | $120 \pm 22$                     | 214                                            | 34.9                            | S3        |
|                         | $\text{Ti}_3\text{C}_2\text{T}_x$ (small flakes)/water | -     | 16.2                            | $89 \pm 20$                      | 158                                            | 19.7                            |           |
| 100 fs, 800 nm, 1 kHz   | NbS <sub>2</sub>                                       | -     | 8.2                             | 2.1                              | 1.0                                            | 0.12                            | S4        |
| 35 fs, 800 nm, 1 kHz    | 1L-WS <sub>2</sub> /Sapphire                           | -     | $1.53 \times 10^6$              | $1183 \times 10^4$               | $3.53 \times 10^{-8}$                          | 230                             | S5        |
|                         | 10L-WS <sub>2</sub> /Sapphire                          | -     | $1.83 \times 10^5$              | $192 \times 10^4$                | $0.57 \times 10^{-8}$                          | 310                             |           |
|                         | 1L-MoS <sub>2</sub> /Sapphire                          | -     | $3.16 \times 10^5$              | $1018 \times 10^4$               | $3.49 \times 10^{-8}$                          | 1110                            |           |
|                         | 13L-MoS <sub>2</sub> /Sapphire                         | -     | $5.20 \times 10^4$              | $144 \times 10^4$                | $0.49 \times 10^{-8}$                          | 940                             |           |
| 70 fs, 800 nm, 10Hz     | SiNS-styrene                                           | 90    | 1.0                             | 203                              | 115.8                                          | 115.8                           | this work |
|                         | SiNS-tBuMA                                             |       |                                 | 164.7                            | 93.9                                           | 93.9                            |           |



**Table S3.** Saturable absorption-related parameters ( $\beta$ : nonlinear absorption coefficient;  $\text{Im}\chi^{(3)}$ : imaginary part of the third-order susceptibility; FOM: figure of merit (i.e.,  $\text{Im}\chi^{(3)}/\alpha_0$ );  $\alpha_s$ : modulation depth;  $I_s$ : saturable intensity) of SiNS-styrene, SiNS-tBuMA, and other 2D nanostructures.

| Sample                                               | Excitation conditions    | T (%) | $\alpha_0$ (cm <sup>-1</sup> ) | $\beta$ ( $\times 10^{-15}$ m/W) | $\text{Im}\chi^{(3)}$ ( $\times 10^{-16}$ esu) | FOM ( $\times 10^{-16}$ esu cm) | $\alpha_s$ (%) | $I_s$ (GW/cm <sup>2</sup> ) | Ref.      |
|------------------------------------------------------|--------------------------|-------|--------------------------------|----------------------------------|------------------------------------------------|---------------------------------|----------------|-----------------------------|-----------|
| SiNS-styrene                                         | 50 fs,<br>400 nm, 10 Hz  | 79    | 2.55                           | -8.3                             | -2.5                                           | 1.0                             | 20             | 255                         | this work |
| SiNS-tBuMA                                           |                          |       |                                | -17                              | -5                                             | 2.0                             | 17             | 620                         |           |
| Graphene/CHP                                         | 100 fs,<br>800 nm, 1 kHz | 16.8  | 17.85                          | -152                             | -87                                            | 4.9                             | N/A            | 583                         | S6        |
|                                                      | 340 fs,<br>515 nm, 1 Hz  | 13.6  | 19.94                          | -480                             | -175                                           | 8.8                             | N/A            | 473                         |           |
| Graphene/glass                                       | 35 fs,<br>800 nm, 1 kHz  | 74    | $2.06 \times 10^4$             | $-116 \times 10^4$               | $-2.8 \times 10^6$                             | 136                             | N/A            | 450                         | S7        |
| MoS <sub>2</sub> /NMP                                | 100 fs,<br>800 nm, 1 kHz | 78.9  | 2.37                           | -46                              | -25.2                                          | 10.6                            | N/A            | 413                         | S8        |
| MoS <sub>2</sub> /NVP                                |                          | 84.7  | 1.66                           | -17.8                            | -10.3                                          | 6.2                             | N/A            | 833                         |           |
| MoS <sub>2</sub> /CHP                                |                          | 75.2  | 2.85                           | -58                              | -33                                            | 11.6                            | N/A            | 405                         |           |
| MoSe <sub>2</sub> /CHP                               | 100fs,<br>800 nm, 1 kHz  | 45.3  | 7.93                           | -25.4                            | -14.5                                          | 1.8                             | N/A            | 590                         | S6        |
|                                                      | 340 fs,<br>515 nm, 1kHz  | 19.4  | 16.41                          | -3570                            | -900                                           | 54.8                            | N/A            | 43                          |           |
| WS <sub>2</sub> /glass                               | 35 fs,<br>800 nm, 1 kHz  | 72    | $2.18 \times 10^4$             | $-76 \times 10^4$                | $-1.4 \times 10^6$                             | 64.2                            | N/A            | 500                         | S7        |
| BP/IPA                                               | 100 fs,<br>400 nm, 1 kHz | 70.5  | 3.49                           | -162                             | -38.6                                          | 11.1                            | 27.6           | 455.3                       | S9        |
|                                                      | 100 fs,<br>800 nm, 1 kHz | 85.6  | 1.55                           | -61.7                            | -29.4                                          | 18.9                            | 12.4           | 334.6                       |           |
| BP/NMP                                               | 100 fs,<br>800 nm, 1 kHz | 83.1  | 1.85                           | -40.8                            | -22.3                                          | 26.3                            | 13.3           | 647.7                       |           |
| Ti <sub>3</sub> C <sub>2</sub> T <sub>x</sub> /glass | 95 fs,<br>800 nm, 1 kHz  | N/A   | 120                            | -117                             | -68.5                                          | 0.6                             | 15-35          | 88.6                        | S10       |
|                                                      | 95 fs,<br>1064 nm, 1 kHz | N/A   | 120                            | -38.6                            | -29.6                                          | 0.25                            | 10-40          | 61.2                        |           |

**Table S4.** NLO parameters ( $\beta$ : nonlinear absorption coefficient,  $\gamma'$ : nonlinear refractive index parameter,  $\text{Im}\chi^{(3)}$ : imaginary part of the third-order susceptibility,  $\text{Re}\chi^{(3)}$ : real part of the third-order susceptibility, and  $\chi^{(3)}$ : third-order susceptibility) of different concentration toluene dispersions of SiNS-tBuMA and SiNS-styrene determined by Z-scan, under 50 fs, 400 nm and 70 fs, 800 nm laser excitation.

| $\lambda$<br>(nm) | Sample       | c<br>(mg/mL) | $\beta$<br>( $\times 10^{-15}$<br>m/W) | $\gamma'$<br>( $\times 10^{-21}$<br>m <sup>2</sup> /W) | $\text{Im}\chi^{(3)}$<br>( $\times 10^{-16}$<br>esu) | $\text{Re}\chi^{(3)}$<br>( $\times 10^{-16}$<br>esu) | $ \chi^{(3)} $<br>( $\times 10^{-16}$<br>esu) |
|-------------------|--------------|--------------|----------------------------------------|--------------------------------------------------------|------------------------------------------------------|------------------------------------------------------|-----------------------------------------------|
| 400               | SiNS-tBuMA   | 0.07         | $-5.3 \pm 0.8$                         | $4.0 \pm 0.5$                                          | $-1.55 \pm 0.2$                                      | $5.7 \pm 0.7$                                        | $5.9 \pm 0.7$                                 |
|                   |              | 0.10         | $-8.3 \pm 0.8$                         | $6.0 \pm 0.9$                                          | $-2.5 \pm 0.2$                                       | $8.6 \pm 1.0$                                        | $9.0 \pm 1.0$                                 |
|                   |              | 0.12         | $-10 \pm 1.0$                          | $7.0 \pm 1.0$                                          | $-2.9 \pm 0.3$                                       | $10.0 \pm 1.0$                                       | $10.4 \pm 1.0$                                |
|                   | SiNS-styrene | 0.05         | $-9.3 \pm 1.0$                         | $8.4 \pm 0.8$                                          | $-2.7 \pm 0.3$                                       | $12.0 \pm 1.0$                                       | $12.3 \pm 1.0$                                |
|                   |              | 0.10         | $-17 \pm 2.0$                          | $15.7 \pm 2.0$                                         | $-5.0 \pm 0.6$                                       | $22.4 \pm 3.0$                                       | $23.0 \pm 3.0$                                |
|                   |              | 0.14         | $-24 \pm 3.0$                          | $22 \pm 3.0$                                           | $-7.0 \pm 0.9$                                       | $31.4 \pm 4.0$                                       | $32.2 \pm 4.0$                                |
| 800               | SiNS-tBuMA   | 0.10         | $165 \pm 20$                           | $33.4 \pm 5.0$                                         | $94.1 \pm 11.0$                                      | $47.6 \pm 7.0$                                       | $105.4 \pm 13.0$                              |
|                   |              | 0.14         | $220 \pm 30$                           | $42 \pm 7.0$                                           | $125.5 \pm 17.0$                                     | $59.9 \pm 10.0$                                      | $139.1 \pm 20.0$                              |
|                   |              | 0.20         | $335 \pm 40$                           | $66 \pm 5.0$                                           | $191.1 \pm 23.0$                                     | $94.1 \pm 7.0$                                       | $213 \pm 24.0$                                |
|                   | SiNS-styrene | 0.05         | $93 \pm 2.0$                           | $28 \pm 2.0$                                           | $53.0 \pm 1.0$                                       | $39.9 \pm 3.0$                                       | $66.3 \pm 3.0$                                |
|                   |              | 0.07         | $141 \pm 6.0$                          | $58 \pm 7.0$                                           | $80.4 \pm 3.0$                                       | $82.7 \pm 10.0$                                      | $115.3 \pm 10.0$                              |
|                   |              | 0.10         | $203 \pm 9$                            | $74 \pm 8.0$                                           | $115.8 \pm 5.0$                                      | $105.5 \pm 11.0$                                     | $156.7 \pm 12.0$                              |

**Table S5.** Third-order susceptibility values of different concentration toluene dispersions of SiNS-tBuMA and SiNS-styrene determined by OKE under 120 fs, 400 nm and 270 fs, 800 nm laser excitation.

| $\lambda$ (nm) | Sample       | c (mg/mL) | $ \chi ^{(3)}$ ( $\times 10^{-16}$ esu) |
|----------------|--------------|-----------|-----------------------------------------|
| 400            | SiNS-tBuMA   | 0.05      | $3.8 \pm 0.4$                           |
|                |              | 0.07      | $5.0 \pm 0.5$                           |
|                | SiNS-styrene | 0.05      | $8.0 \pm 1.0$                           |
|                |              | 0.07      | $12 \pm 1.0$                            |
| 800            | SiNS-tBuMA   | 0.03      | $13 \pm 1.0$                            |
|                |              | 0.05      | $24 \pm 2.0$                            |
|                | SiNS-styrene | 0.03      | $29 \pm 3.0$                            |
|                |              | 0.05      | $38 \pm 4.0$                            |

**Table S6.** NLO refraction-related parameters ( $\gamma'$ : nonlinear refractive index parameter;  $\text{Re}\chi^{(3)}$ : real part of the third-order susceptibility; FOM: figure of merit (i.e.,  $\text{Re}\chi^{(3)}/\alpha_0$ ) of SiNS-styrene, SiNS-tBuMA,  $\text{MoX}_2$  (X=S, Se, Te), single-layered graphene (SLG), BP, and  $\text{Ti}_3\text{C}_2\text{T}_x$ .

| Sample                                         | Excitation conditions    | T (%)     | $\alpha_0$ ( $\text{cm}^{-1}$ ) | $\gamma'$ ( $\times 10^{-21}$ $\text{m}^2/\text{W}$ ) | $\text{Re}\chi^{(3)}$ ( $\times 10^{-16}$ esu) | FOM ( $\times 10^{-16}$ esu cm) | Ref.      |
|------------------------------------------------|--------------------------|-----------|---------------------------------|-------------------------------------------------------|------------------------------------------------|---------------------------------|-----------|
| SiNS-styrene                                   | 50 fs,<br>400 nm, 10 Hz  | 79        | 2.55                            | 15.7                                                  | 22.4                                           | 8.8                             | this work |
| SiNS-tBuMA                                     |                          |           |                                 | 6                                                     | 8.6                                            | 3.4                             |           |
| SiNS-styrene                                   | 70 fs,<br>800 nm, 10 Hz  | 90        | 1.0                             | 74                                                    | 105.5                                          | 105.5                           |           |
| SiNS-tBuMA                                     |                          |           |                                 | 33.4                                                  | 47.6                                           | 47.6                            |           |
| $\text{MoX}_2/\text{CHP}$                      | 100 fs,<br>800 nm, 1 kHz | 32.6-86.3 | 1.47-11.22                      | $\sim 0$                                              | $\sim 0$                                       | $\sim 0$                        | S8        |
|                                                | 340 fs,<br>515 nm, 1 kHz | 7.94-87.6 | 1.32-25.34                      | $\sim 0$                                              | $\sim 0$                                       | $\sim 0$                        |           |
| SLG/ODCB                                       | 50 fs,<br>800 nm, 10 Hz  |           | 5.7                             | 7.1                                                   | 10.7                                           | 1.9                             | S11       |
| BP/NMP                                         | 100 fs,<br>800 nm, 1 kHz | 68        | 3.86                            | -(9.37-20.7)                                          | -(13.6-30.1)                                   | 3.5-7.8                         | S12       |
| $\text{Ti}_3\text{C}_2\text{T}_x/\text{glass}$ | 95 fs,<br>800 nm, 1 kHz  | N/A       | 120                             | -46.6                                                 | -474                                           | 3.9                             | S10       |
|                                                | 95 fs,<br>1064 nm, 1 kHz |           |                                 | -34.7                                                 | -353                                           | 2.9                             |           |

## References

- [S1] L. Ran, Z. Chai, Y. Gao, W. Wu, Q. Chang, D. Kong, *Curr. Appl. Phys.*, 2016, **16**, 985–988.
- [S2] X. F. Jiang, L. Polavarapu, S. T. Neo, T. Venkatesan, Q. H. Xu, *J. Phys. Chem. Lett.*, 2012, **3**, 785–790.
- [S3] G. Wang, D. Bennett, C. (John) Zhang, C. Ó Coileáin, M. Liang, N. McEvoy, J. J. Wang, J. Wang, K. Wang, V. Nicolosi, W. J. Blau, *Adv. Opt. Mater.*, 2020, **8**, 1902021.
- [S4] M. Maldonado, M. L. da Silva Neto, P. G. Vianna, H. B. Ribeiro, V. O. Gordo, I. C. Carvalho, L. de S. Menezes, C. B. de Araújo, C. J. S. de Matos, L. Seixas, A. M. Jawaid, R. Busch, A. J. Ritter, R. A. Vaia, A. S. L. Gomes, *J. Phys. Chem. C*, 2020, **124**, 15425–15433.
- [S5] C. Lu, M. Luo, Y. Ge, Y. Huang, Q. Zhao, Y. Zhou, X. Xu, *ACS Appl. Mater. Interfaces*, 2021, **14**, 2390–2400.
- [S6] K. Wang, Y. Feng, C. Chang, J. Zhan, C. Wang, Q. Zhao, J. N. Coleman, L. Zhang, W. J. Blau, J. Wang, *Nanoscale*, 2014, **6**, 10530–10535.
- [S7] C. Lu, C. Quan, K. Si, X. Xu, C. He, Q. Zhao, Y. Zhan, X. Xu, *Appl. Surf. Sci.*, 2019, **479**, 1161–1168.
- [S8] K. Wang, J. Wang, J. Fan, M. Lotya, A. O'Neill, D. Fox, Y. Feng, X. Zhang, B. Jiang, Q. Zhao, H. Zhang, J. N. Coleman, L. Zhang, W. J. Blau, *ACS Nano*, 2013, **7**, 9260–9267.
- [S9] S. B. Lu, L. L. Miao, Z. N. Guo, X. Qi, C. J. Zhao, H. Zhang, S. C. Wen, D. Y. Tang, D. Y. Fan, *Opt. Express*, 2015, **23**, 11183–11194.
- [S10] X. Jiang, S. Liu, W. Liang, S. Luo, Z. He, Y. Ge, H. Wang, R. Cao, F. Zhang, Q. Wen, J. Li, Q. Bao, D. Fan, H. Zhang, *Laser Photonics Rev.*, 2017, **12**, 1700229.
- [S11] M. Stavrou, I. Dalamaras, N. Karampitsos, S. Couris, *J. Phys. Chem. C*, 2020, **124**, 27241–27249.
- [S12] Y. Xu, F. Jiang, Y. Ge, Z. Guo, Z. Zeng, Q.-H. Xu, H. Zhang, X.-F. Yu, D. Fan, *J. Mater. Chem. C*, 2017, **5**, 3007–3013.
